# Supplementary material for: Structure–reactivity relationship in Co3O4promoted Au/CeO2catalysts for the CH3OH oxidation reaction revealed by in situ FTIR and operando EXAFS studies
Source: Royal Society of Chemistry journal article supplement (doi:10.1039/c6ta06442f), 2016-12-20
Supplement: c6ta06442f1.pdf [file c6ta06442f1.pdf]

## ELECTRONIC SUPPLEMENTARY INFORMATION

### **Structure-reactivity relationship in $\text{Co}_3\text{O}_4$ promoted Au/CeO<sub>2</sub> catalysts for the CH<sub>3</sub>OH oxidation reaction revealed by in situ FTIR and operando EXAFS studies**

M. Manzoli<sup>a\*</sup>, F. Vindigni<sup>b</sup>, T. Tabakova<sup>c</sup>, C. Lamberti<sup>b,f</sup>, D. Dimitrov<sup>d</sup>, K. Ivanov<sup>d</sup>, G. Agostini<sup>e,g</sup>

---

<sup>a</sup> *Department of Drug Science and Technology and NIS Interdepartmental Centre, University of Torino, 10125 Torino, Italy.*

<sup>b</sup> *Department of Chemistry and NIS Interdepartmental Centre, University of Torino, 10125 Torino, Italy.*

<sup>c</sup> *Institute of Catalysis, Bulgarian Academy of Sciences, 1113 Sofia, Bulgaria*

<sup>d</sup> *Department of Chemistry, Agricultural University, 4000 Plovdiv, Bulgaria*

<sup>e</sup> *Leibniz Institute for Catalysis at the University of Rostock, Albert-Einstein-Str. 29a, D-18059 Rostock, Germany*

<sup>f</sup> *IRC “Smart Materials”, Southern Federal University, Zorge Street 5, 344090 Rostov-on-Don, Russia.*

<sup>g</sup> *European Synchrotron Radiation Facility, 38043 Grenoble, France*

---

mail to: \* [maela.manzoli@unito.it](mailto:maela.manzoli@unito.it)

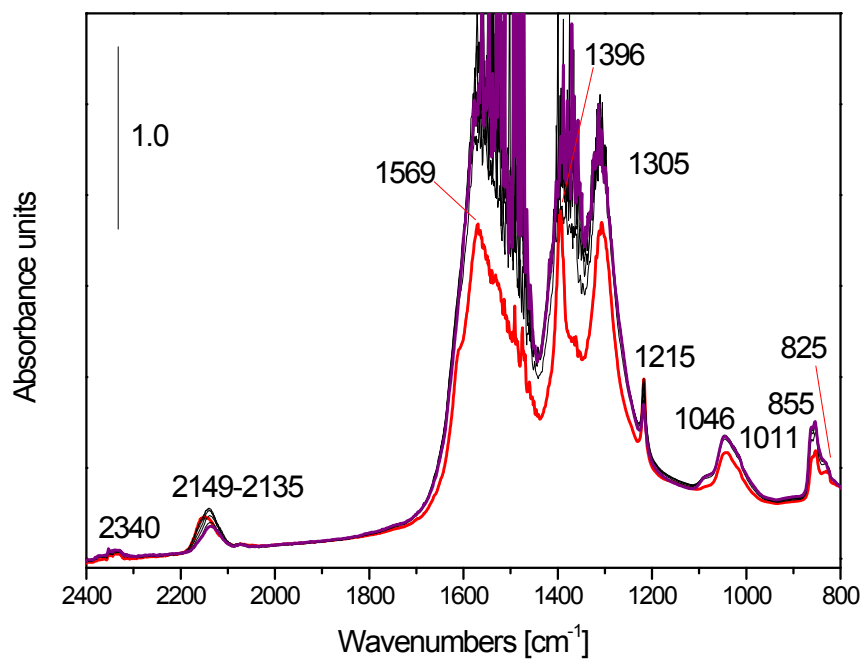

**Figure S1.** FTIR difference spectra collected upon CO inlet (15 mbar) at r.t. and subsequent pressure decreases down to  $1.0 \times 10^{-3}$  mbar on AuCe<sub>10</sub>Co before methanol oxidation reaction.

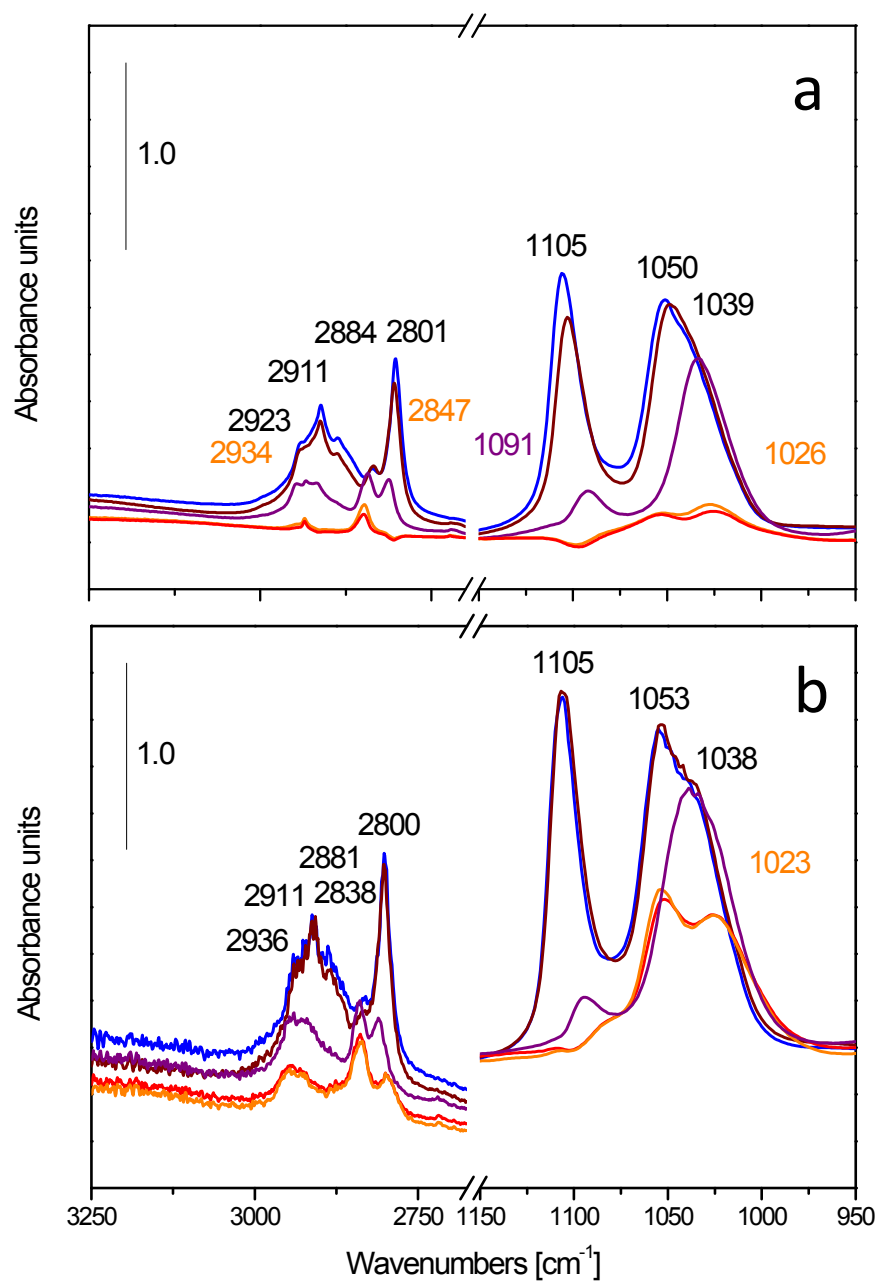

**Figure S2.** FTIR difference spectra collected on AuCe (section a) and AuCe10Co (section b) upon the adsorption of 5 mbar CH<sub>3</sub>OH at r.t. (blue lines) and at increasing temperature after the inlet of 5 mbar O<sub>2</sub> on preadsorbed methanol: 50 °C (brown lines), 75 °C (violet lines), after 10 min (orange lines) and 20 min (red lines) at 100 °C.

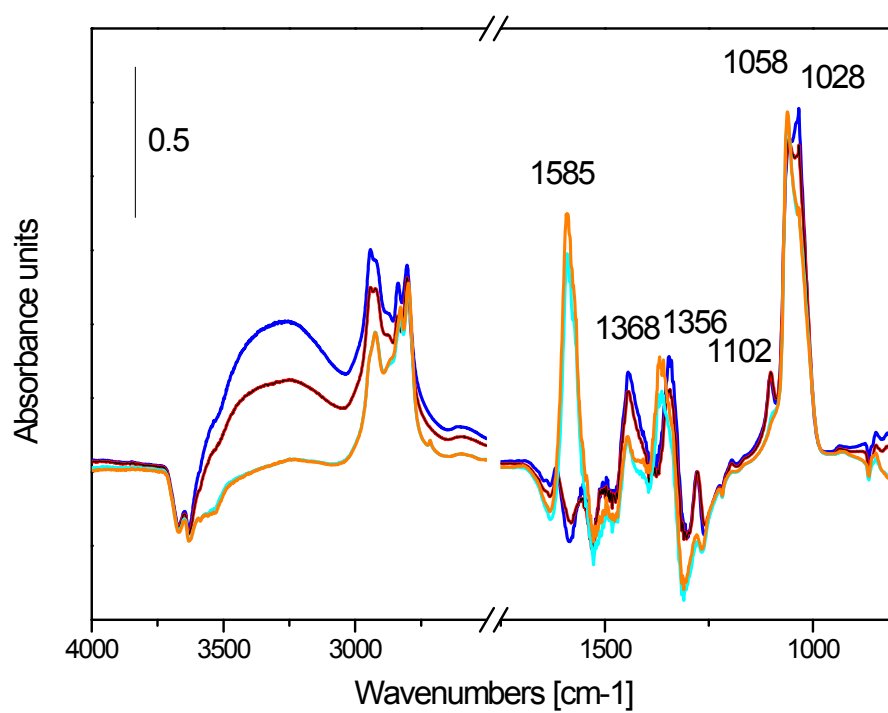

**Figure S3.** FTIR difference spectra collected on AuCe in contact with 5 mbar methanol after 10 min at r.t. (blue line), at 50 °C (red line), at 75 °C (black line), at 100 °C (cyan line) and after 20 min at the same temperature (orange line).

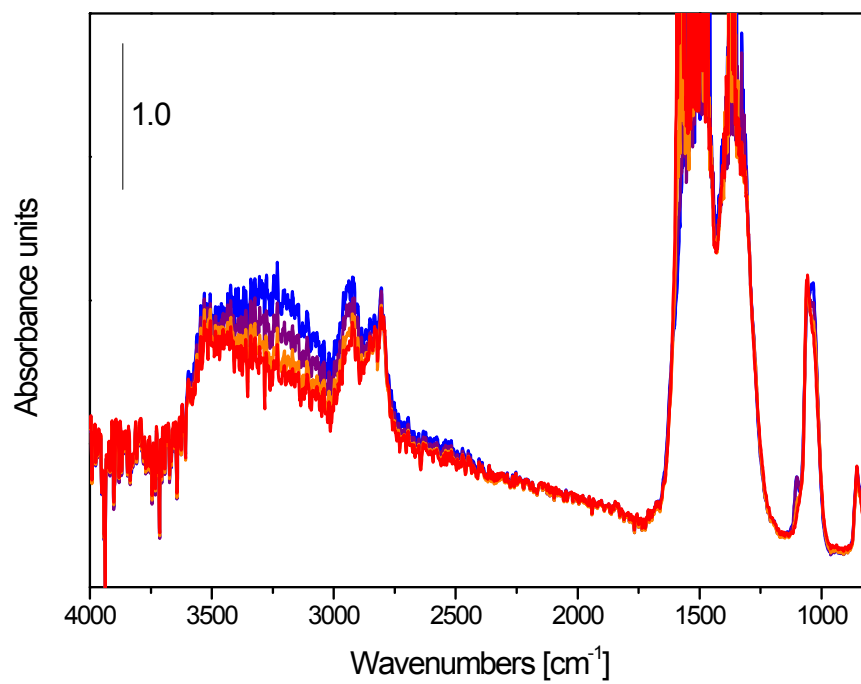

**Figure S4.** FTIR difference spectra collected on AuCe<sub>10</sub>Co in contact with 5 mbar methanol after 10 min at r.t. (blue line), at 50 °C (violet line), at 75 °C (orange line) and at 100 °C (red line).

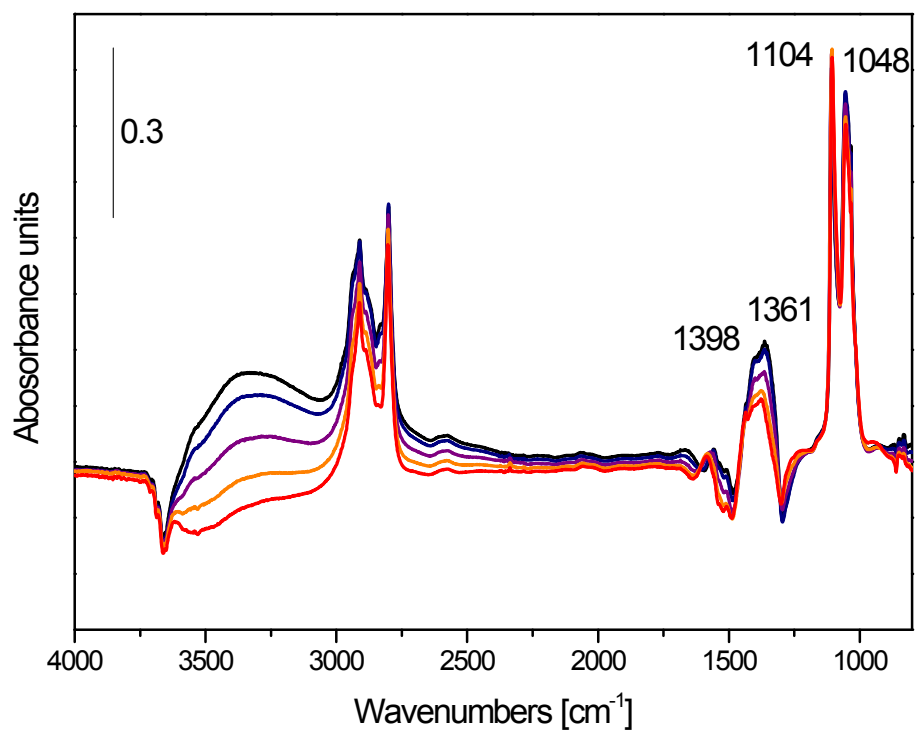

**Figure S5.** FTIR difference spectra collected on Ce10Co with the methanol/oxygen mixture after 10 min at r.t (black curve), at 50 °C (blue curve), at 75 °C (orange curve), and at 100 °C (red curve).

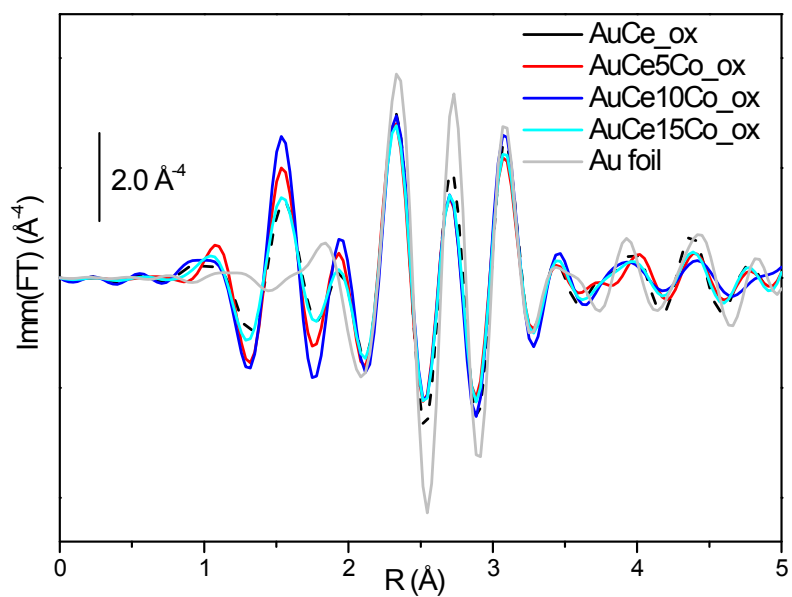

**Figure S6:** Immaginary part of  $k^3$ -weighted, phase uncorrected, FT of the Au  $L_3$ -edge EXAFS spectra of the catalysts prepared on differently Co doped ceria substrate and submitted to thermal treatment in oxygen at  $400^\circ\text{C}$ . Same data reported in Figure 5a.
